# Supplementary material for: Deactivation pathways of ethylene polymerization catalysts derived from titanium and zirconium 1,3-bis(furyl)-1,1,3,3-tetramethyldisilazide complexes
Source: Royal Society of Chemistry journal article supplement (doi:10.1039/b704625a), 2007-01-01

## Deactivation pathways of ethylene polymerization catalysts derived from titanium and zirconium 1,3-bis(furyl)-1,1,3,3-tetramethyldisilazide complexes

Lloyd T. J. Evans, Martyn P. Coles\*, F. Geoffrey N. Cloke,\* and Peter B. Hitchcock

*Department of Chemistry, University of Sussex, Falmer, Brighton BN1 9QJ. UK. email: m.p.coles@sussex.ac.uk; fax: +44 (0)1273 677196.*

### Table of Contents:

|     |                  |                                                                                        |
|-----|------------------|----------------------------------------------------------------------------------------|
| p2  | <b>Figure 1</b>  | $^1\text{H}$ NMR spectrum of $\text{Zr}\{\text{i}\}(\text{NMe}_2)_3$ ( <b>2a</b> )     |
| p3  | <b>Figure 2</b>  | $^{13}\text{C}$ NMR spectrum of $\text{Zr}\{\text{i}\}(\text{NMe}_2)_3$ ( <b>2a</b> )  |
| p4  | <b>Figure 3</b>  | $^1\text{H}$ NMR spectrum of $\text{Zr}\{\text{ii}\}(\text{NMe}_2)_3$ ( <b>2b</b> )    |
| p5  | <b>Figure 4</b>  | $^{13}\text{C}$ NMR spectrum of $\text{Zr}\{\text{ii}\}(\text{NMe}_2)_3$ ( <b>2b</b> ) |
| p6  | <b>Figure 5</b>  | $^1\text{H}$ NMR spectrum of $\text{Zr}\{\text{i}\}_2\text{Cl}_2$ ( <b>5a</b> )        |
| p7  | <b>Figure 6</b>  | $^{13}\text{C}$ NMR spectrum of $\text{Zr}\{\text{i}\}_2\text{Cl}_2$ ( <b>5a</b> )     |
| p8  | <b>Figure 7</b>  | Mass spectrum of $\text{Zr}\{\text{i}\}_2\text{Cl}_2$ ( <b>5a</b> )                    |
| p9  | <b>Figure 8</b>  | $^1\text{H}$ NMR spectrum of $\text{Ti}\{\text{ii}\}_2\text{Me}_2$ ( <b>7b</b> )       |
| p10 | <b>Figure 9</b>  | $^{13}\text{C}$ NMR spectrum of $\text{Ti}\{\text{ii}\}_2\text{Me}_2$ ( <b>7b</b> )    |
| p11 | <b>Figure 10</b> | Mass spectrum of $\text{Ti}\{\text{ii}\}_2\text{Me}_2$ ( <b>7b</b> )                   |

Figure 1  $^1\text{H}$  NMR spectrum of  $\text{Zr}\{\text{i}\}(\text{NMe}_2)_3$  (**2a**)

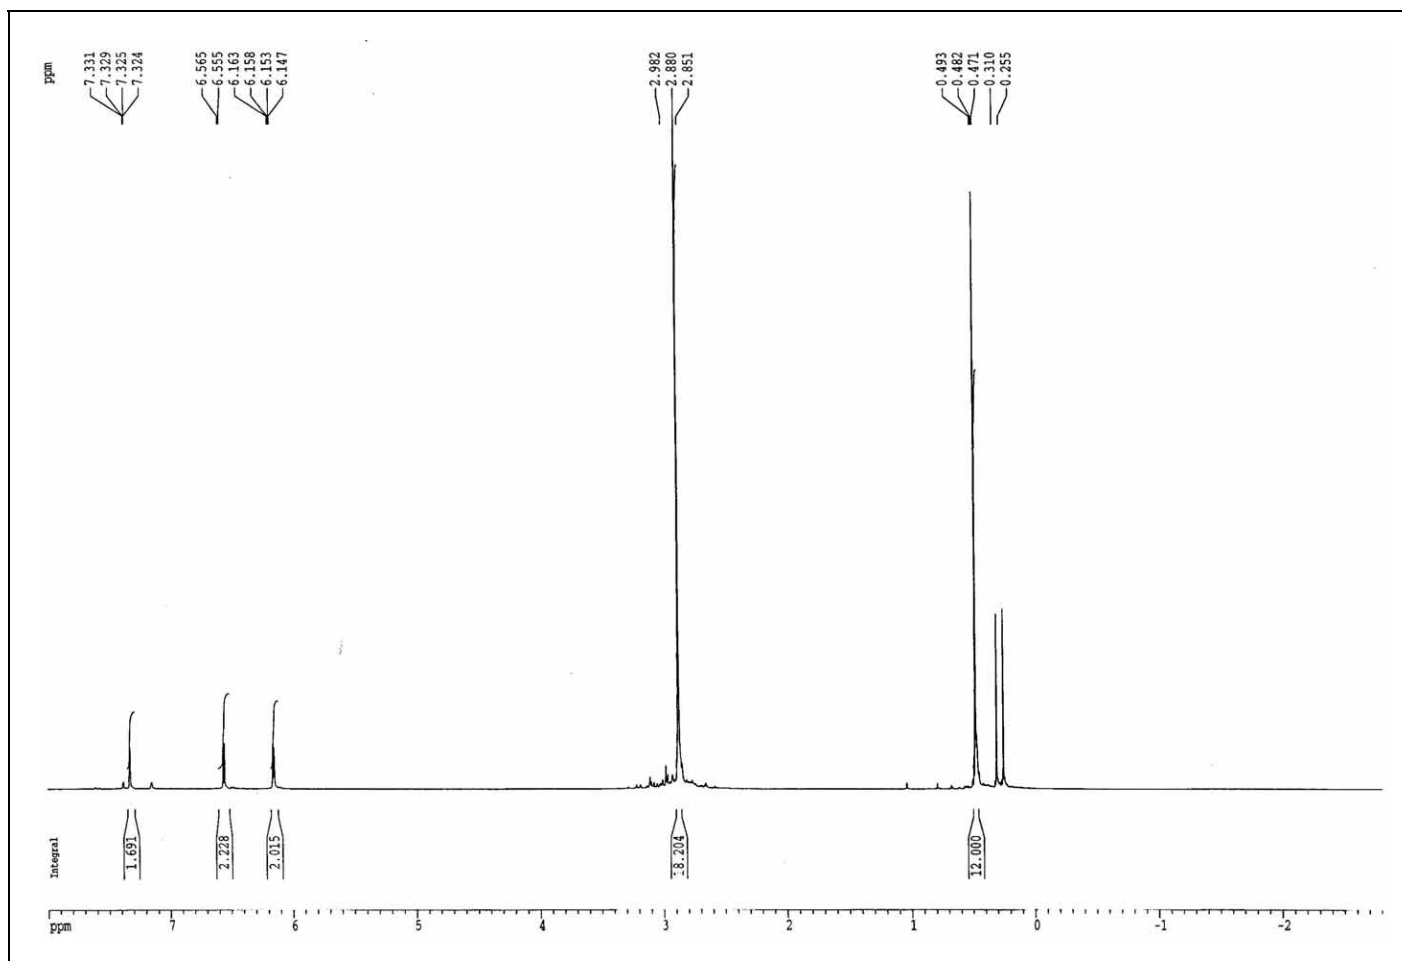

**Figure 2**  $^{13}\text{C}$  NMR spectrum of  $\text{Zr}\{\text{i}\}(\text{NMe}_2)_3$  (**2a**)

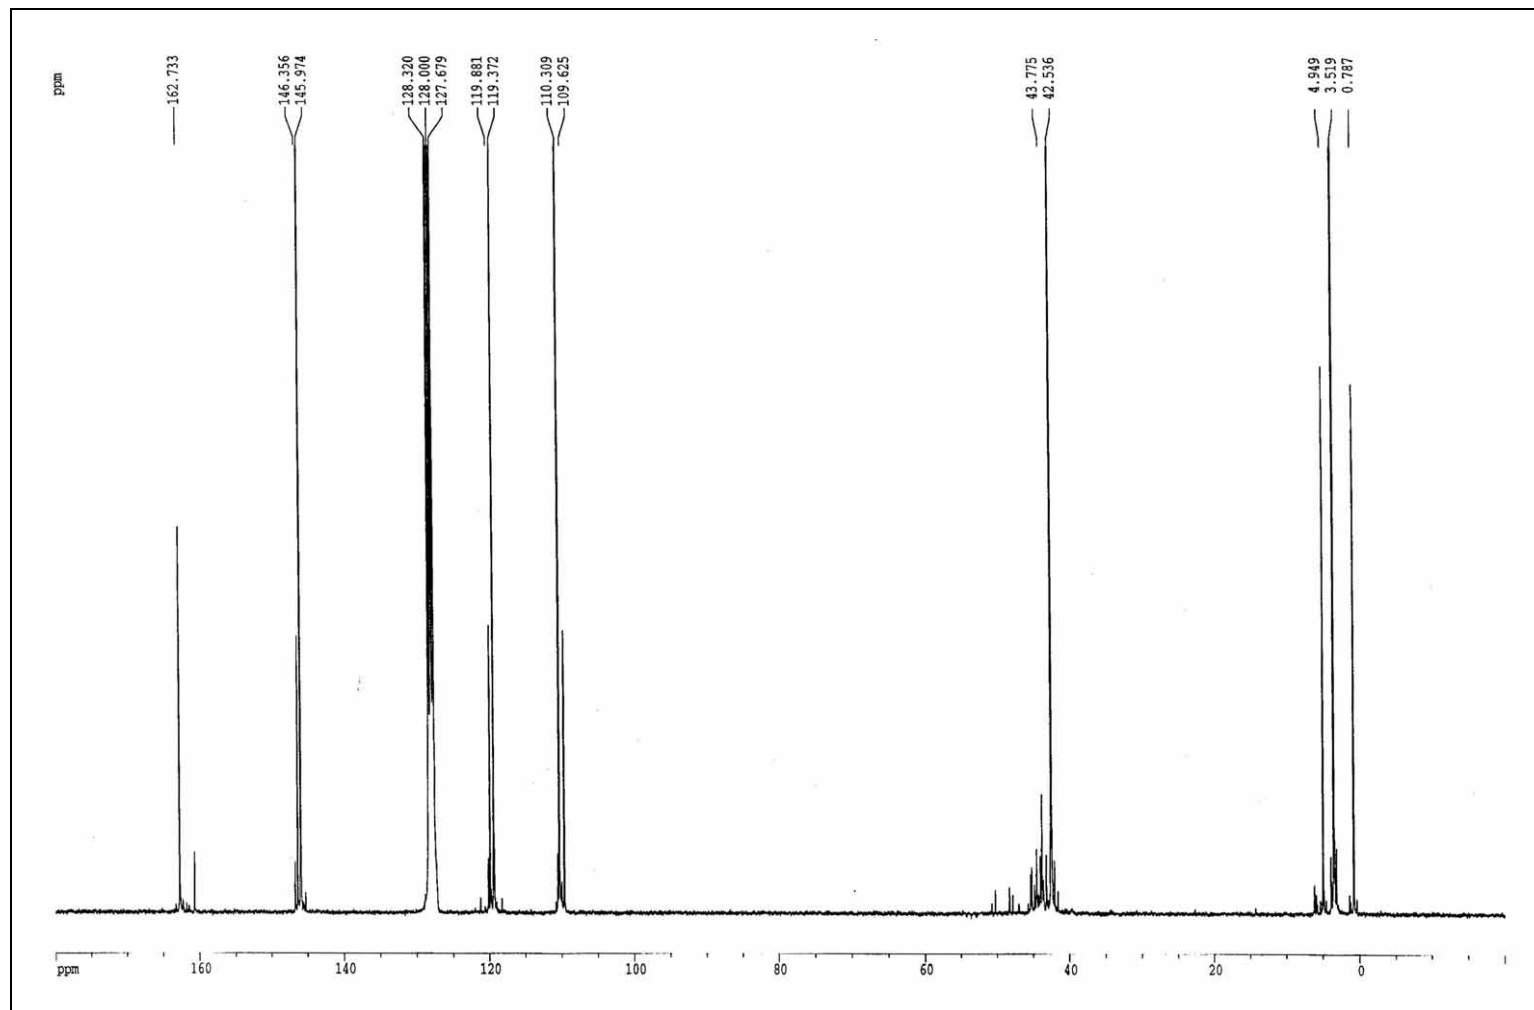

Figure 3  $^1\text{H}$  NMR spectrum of  $\text{Zr}\{\text{ii}\}(\text{NMe}_2)_3$  (**2b**)

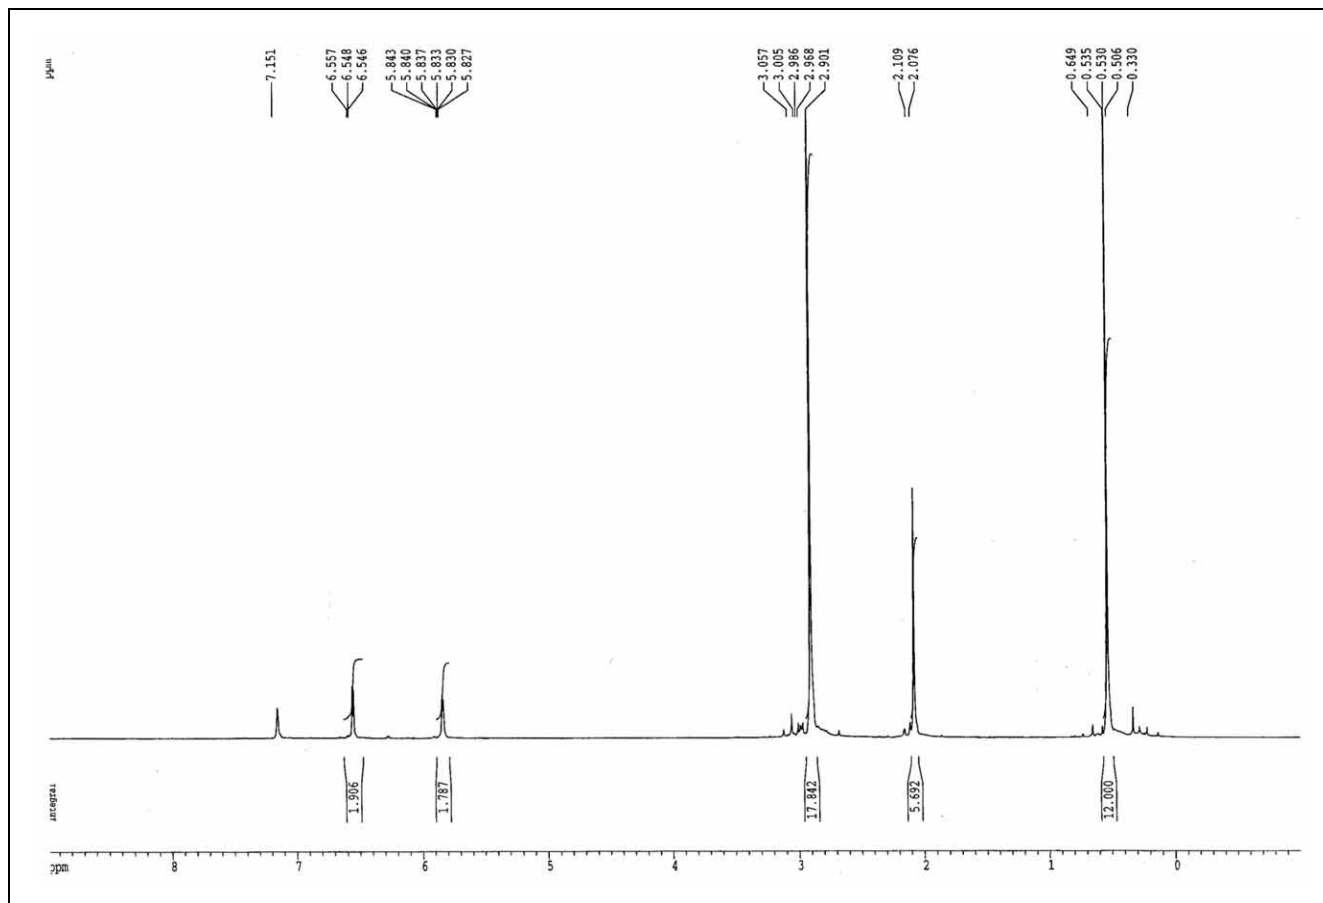

**Figure 4**  $^{13}\text{C}$  NMR spectrum of  $\text{Zr}\{\text{ii}\}(\text{NMe}_2)_3$  (**2b**)

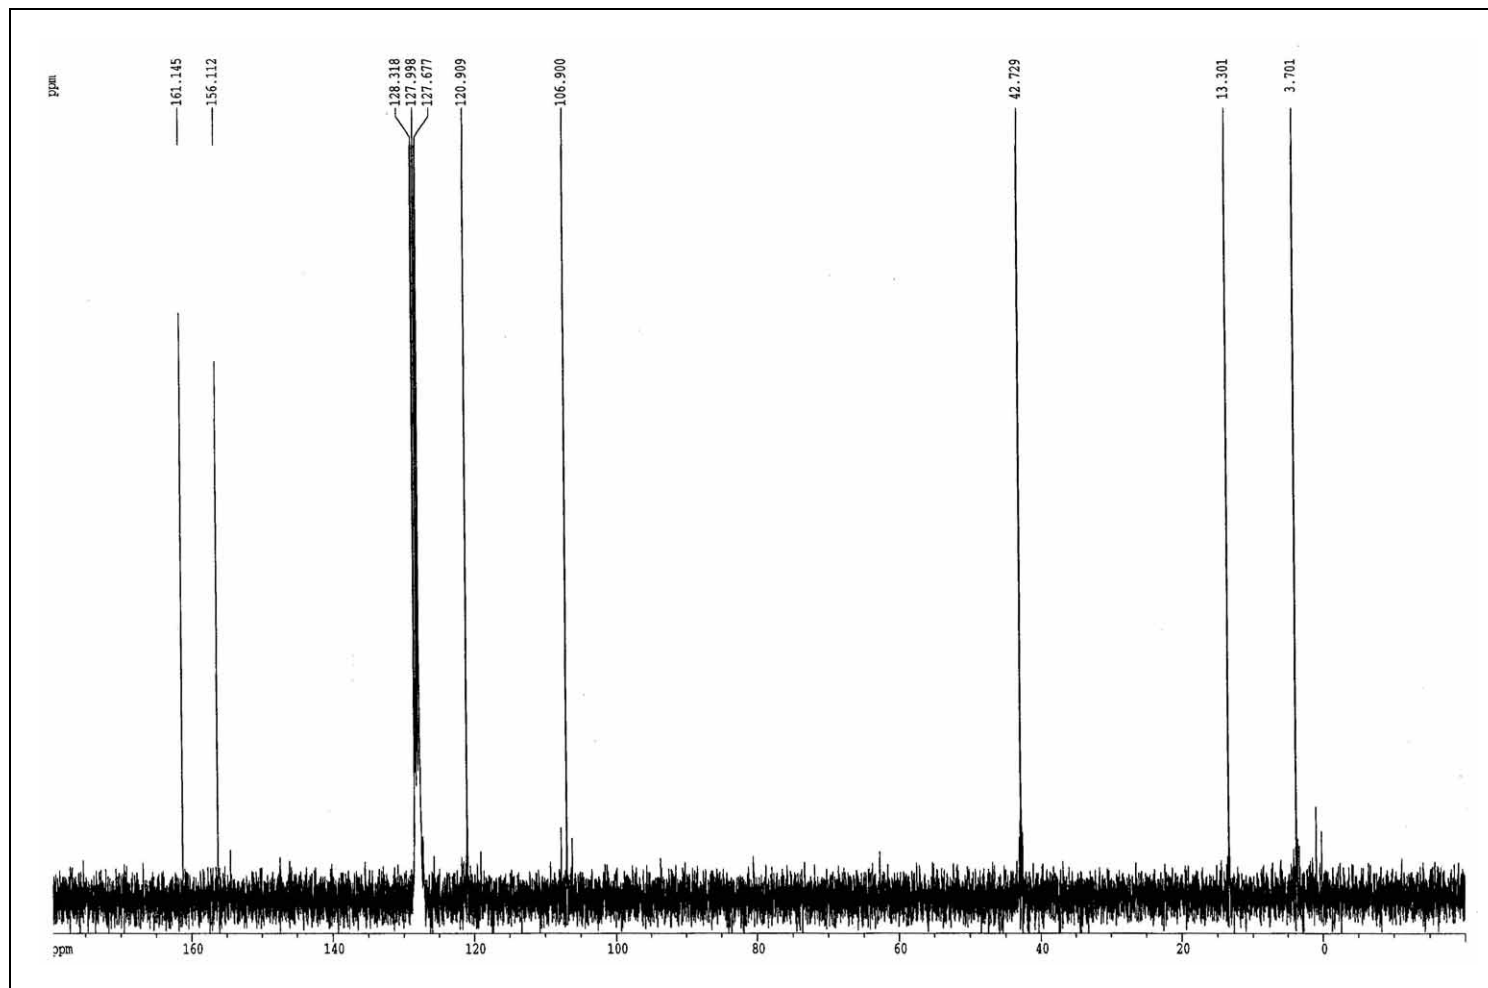

Figure 5  $^1\text{H}$  NMR spectrum of  $\text{Zr}\{\text{i}\}_2\text{Cl}_2$  (**5a**)

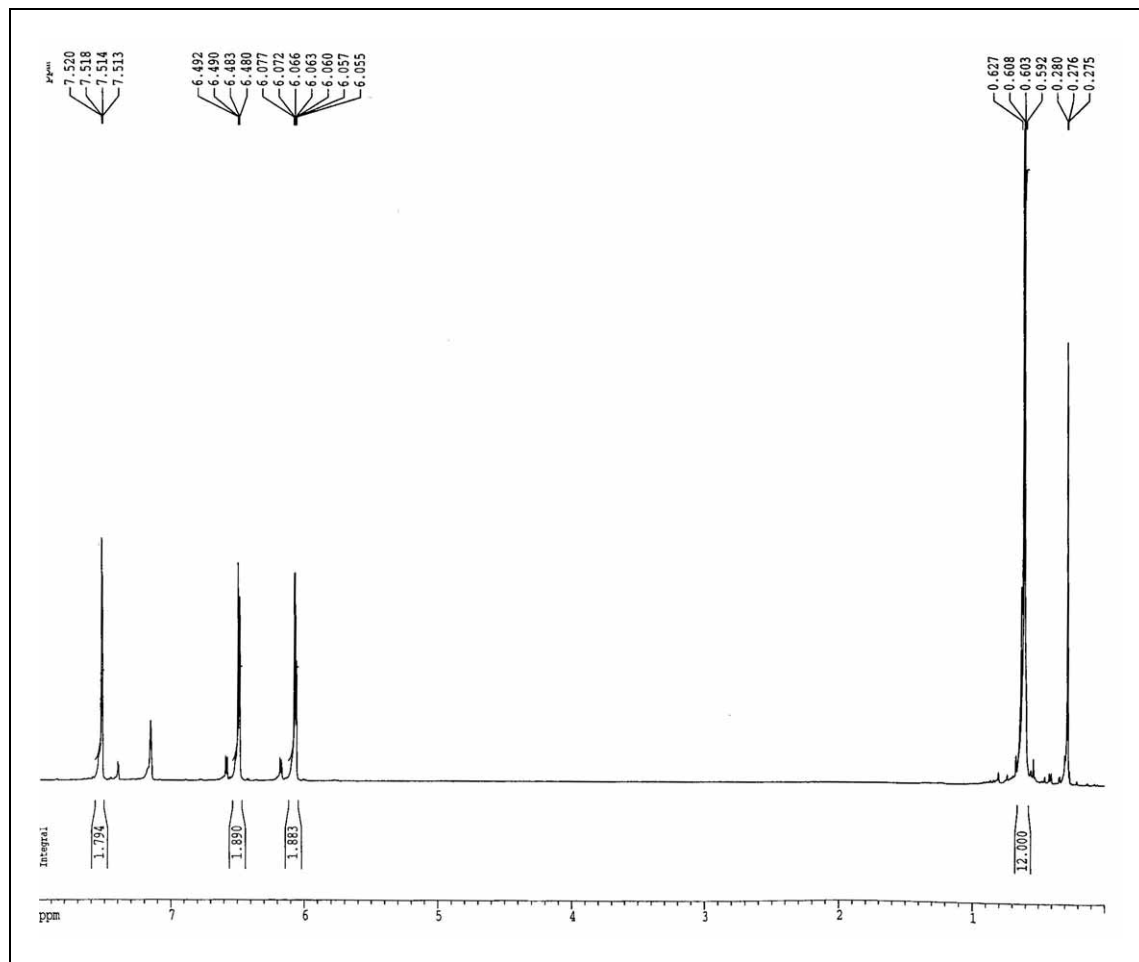

Figure 6  $^{13}\text{C}$  NMR spectrum of  $\text{Zr}\{\text{i}\}_2\text{Cl}_2$  (**5a**)

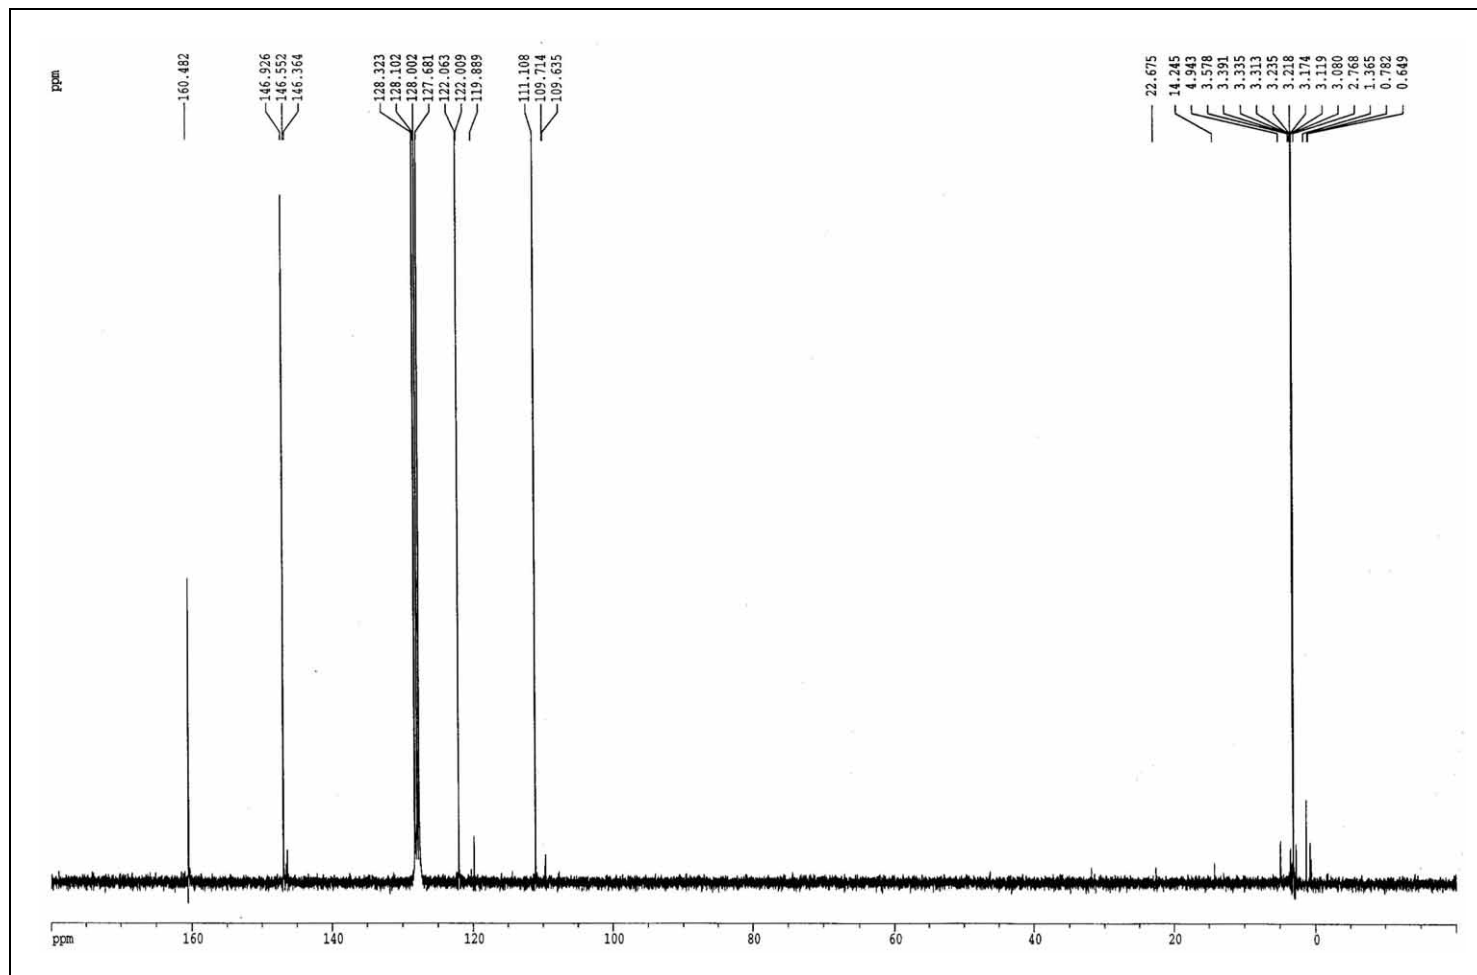

Figure 7 Mass spectrum of Zr{I}2Cl2 (5a)

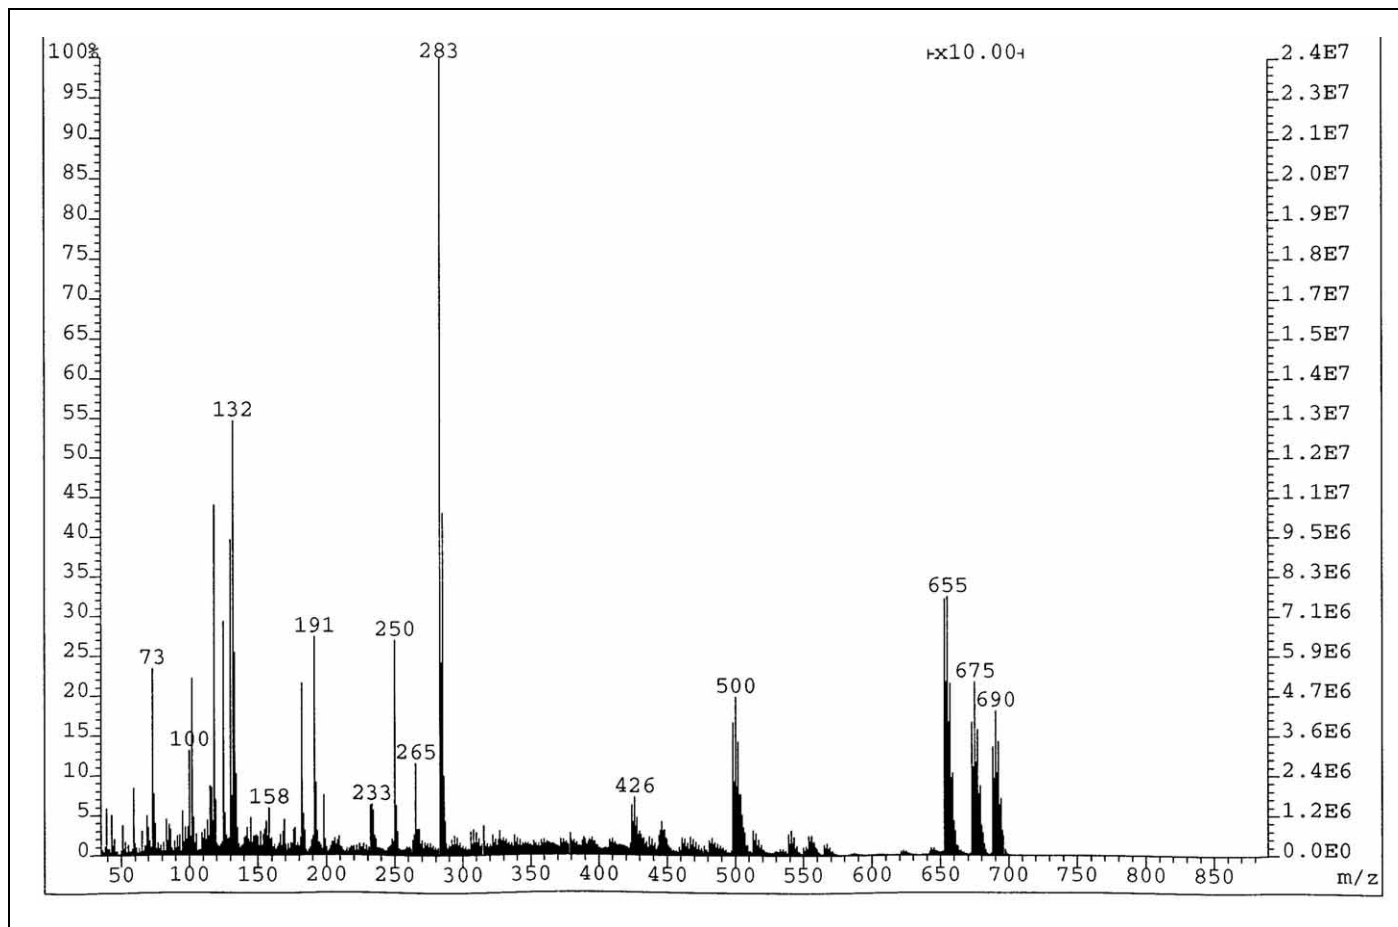



Figure 8  $^1\text{H}$  NMR spectrum of  $\text{Ti}(\text{ii})_2\text{Me}_2$  (**7b**)

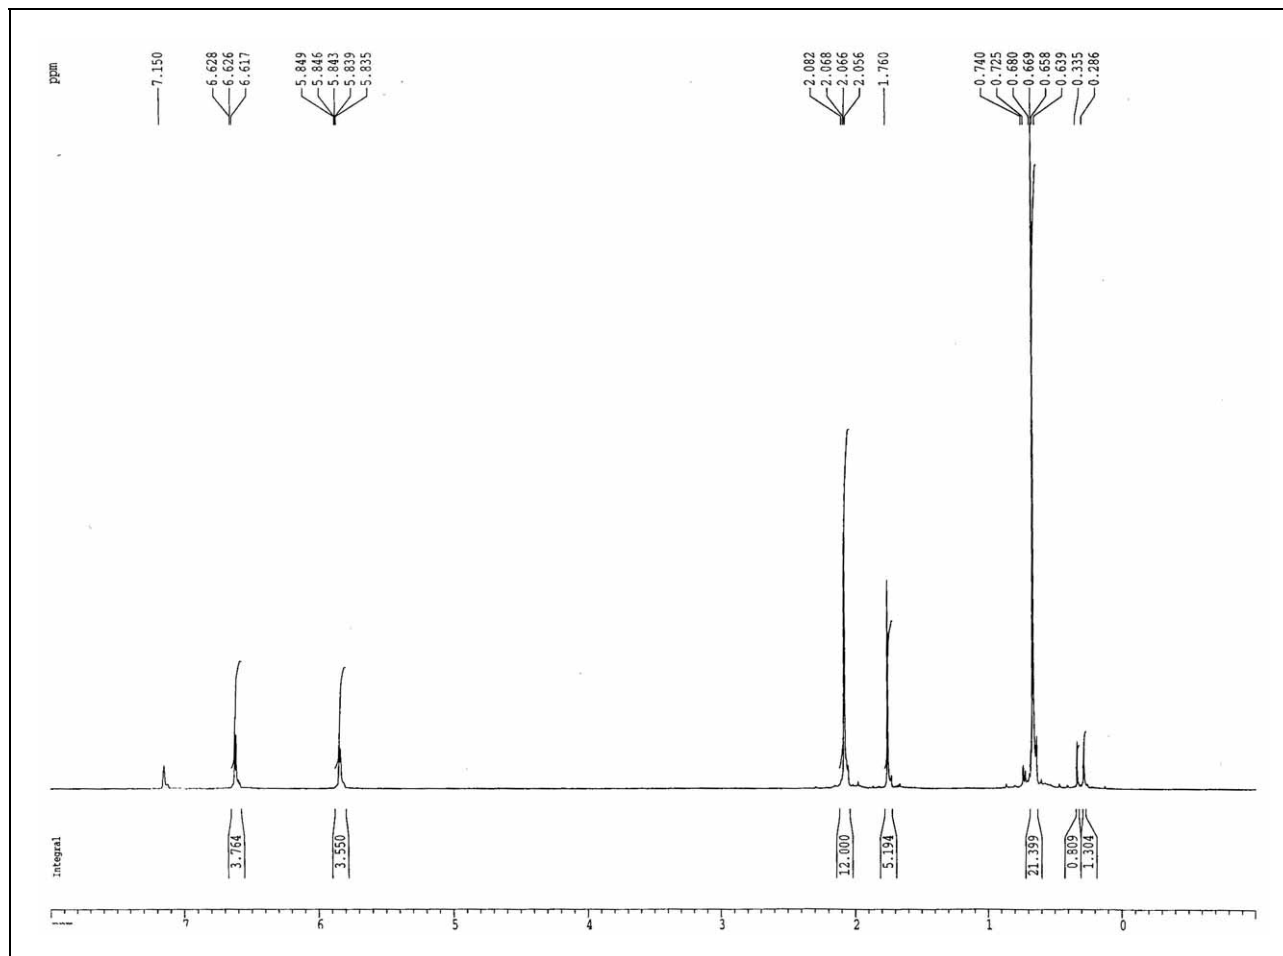

**Figure 9**  $^{13}\text{C}$  NMR spectrum of  $\text{Ti}\{\text{ii}\}_2\text{Me}_2$  (**7b**)

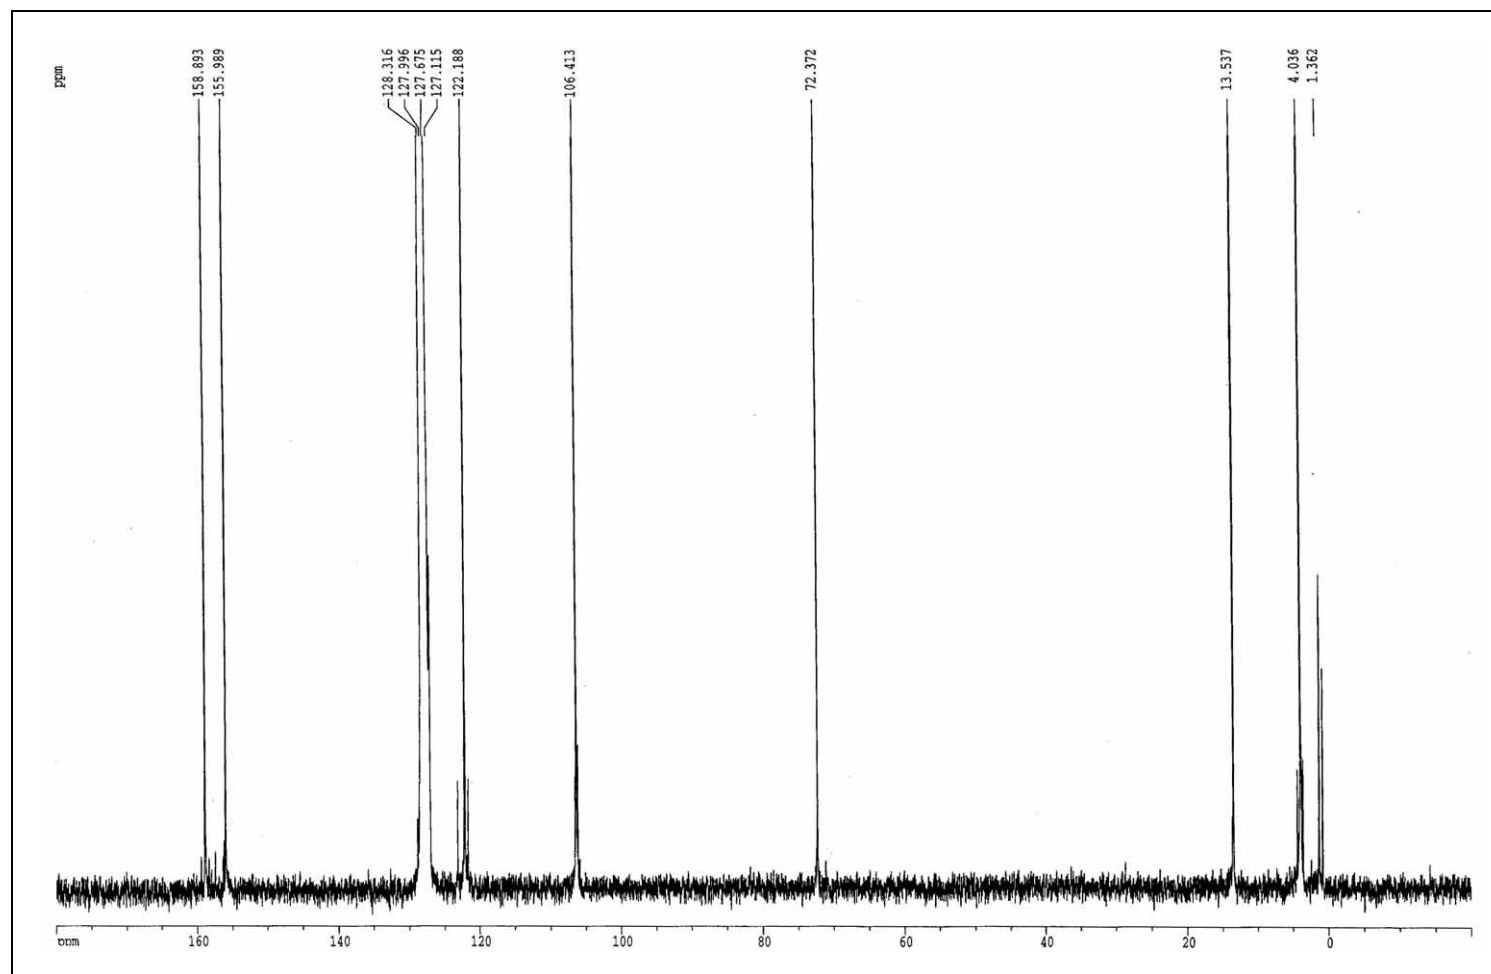

Figure 10 Mass spectrum of  $\text{Ti(ii)}_2\text{Me}_2$  (7b)

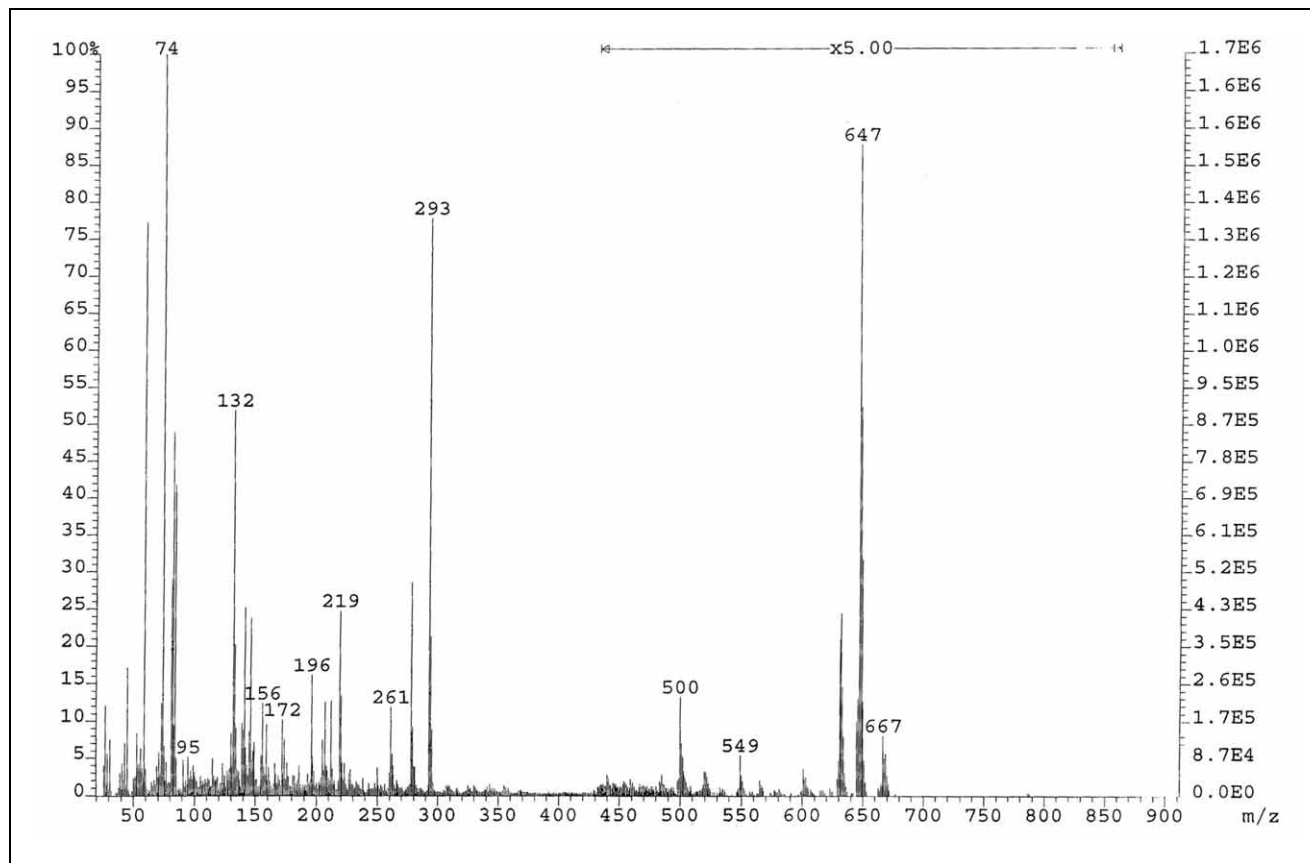

Supplement: b704625a.pdf [file b704625a.pdf]
